# Supplementary material for: Rare actinobacteria isolated from the hypersaline Ojo de Liebre Lagoon as a source of novel bioactive compounds with biotechnological potential
Source: PubMed Central journal article supplement (PMC8941997; doi:10.1099/mic.0.001144), 2022-02-25
Supplement: mic-168-1144-s001.pdf [file mic-168-1144-s001.pdf]

SUPPLEMENTARY MATERIAL

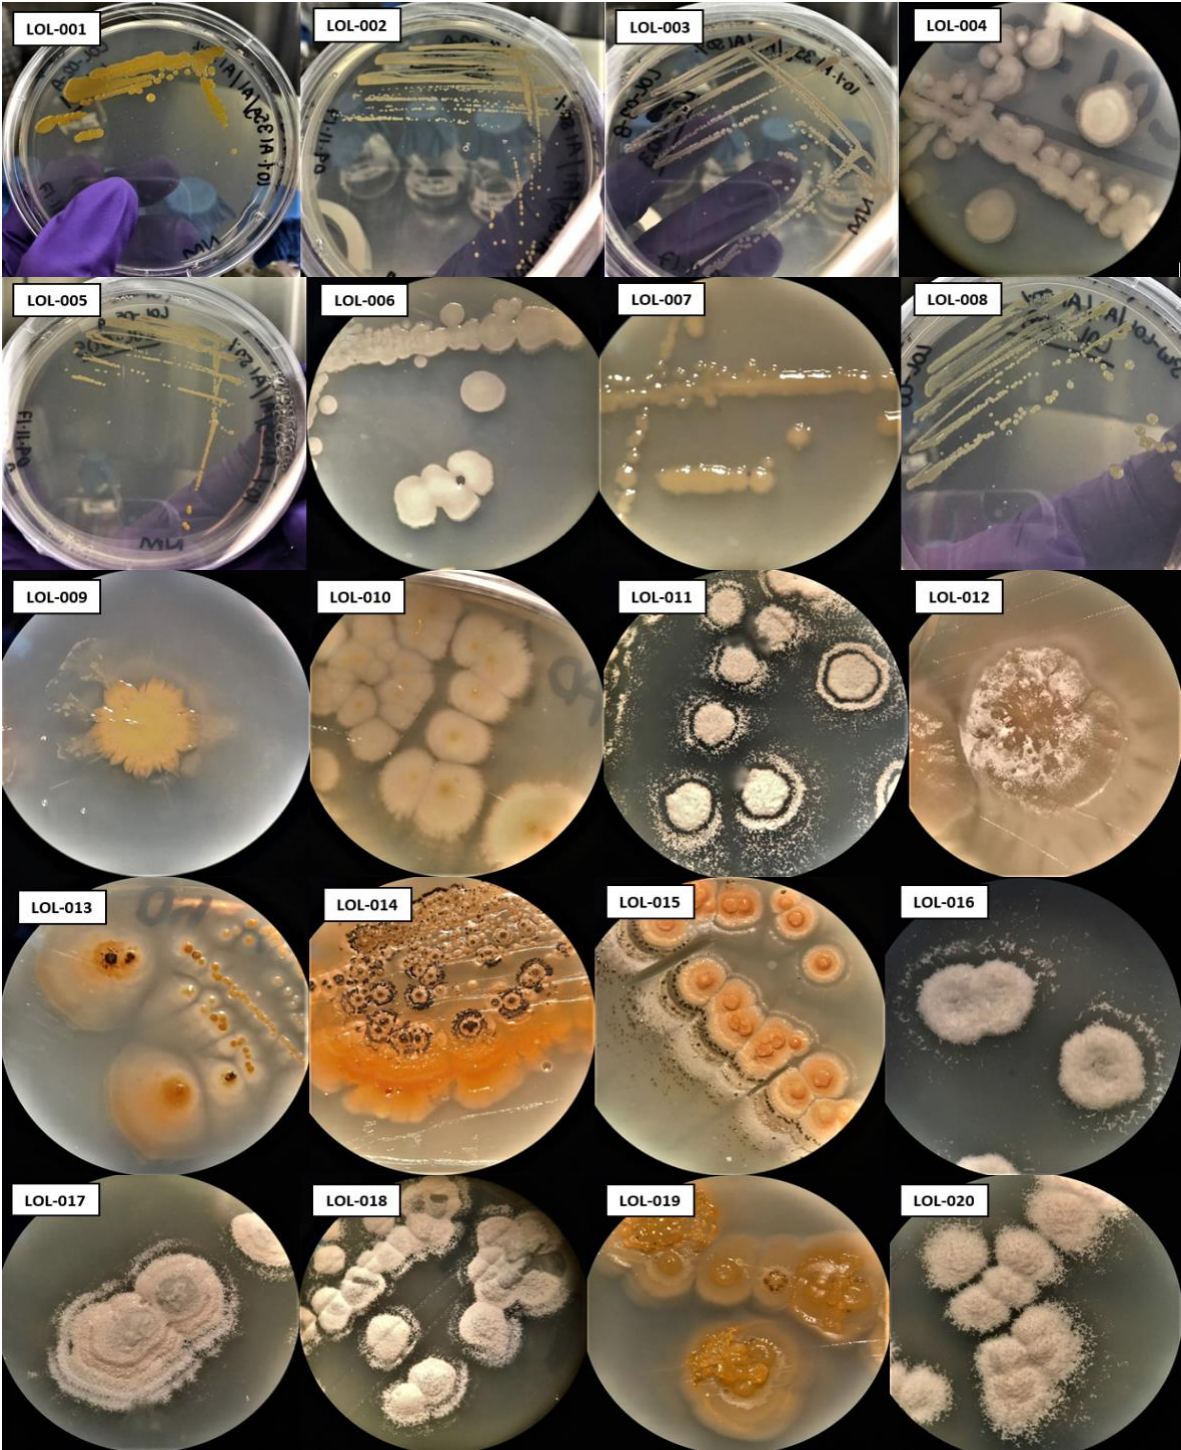

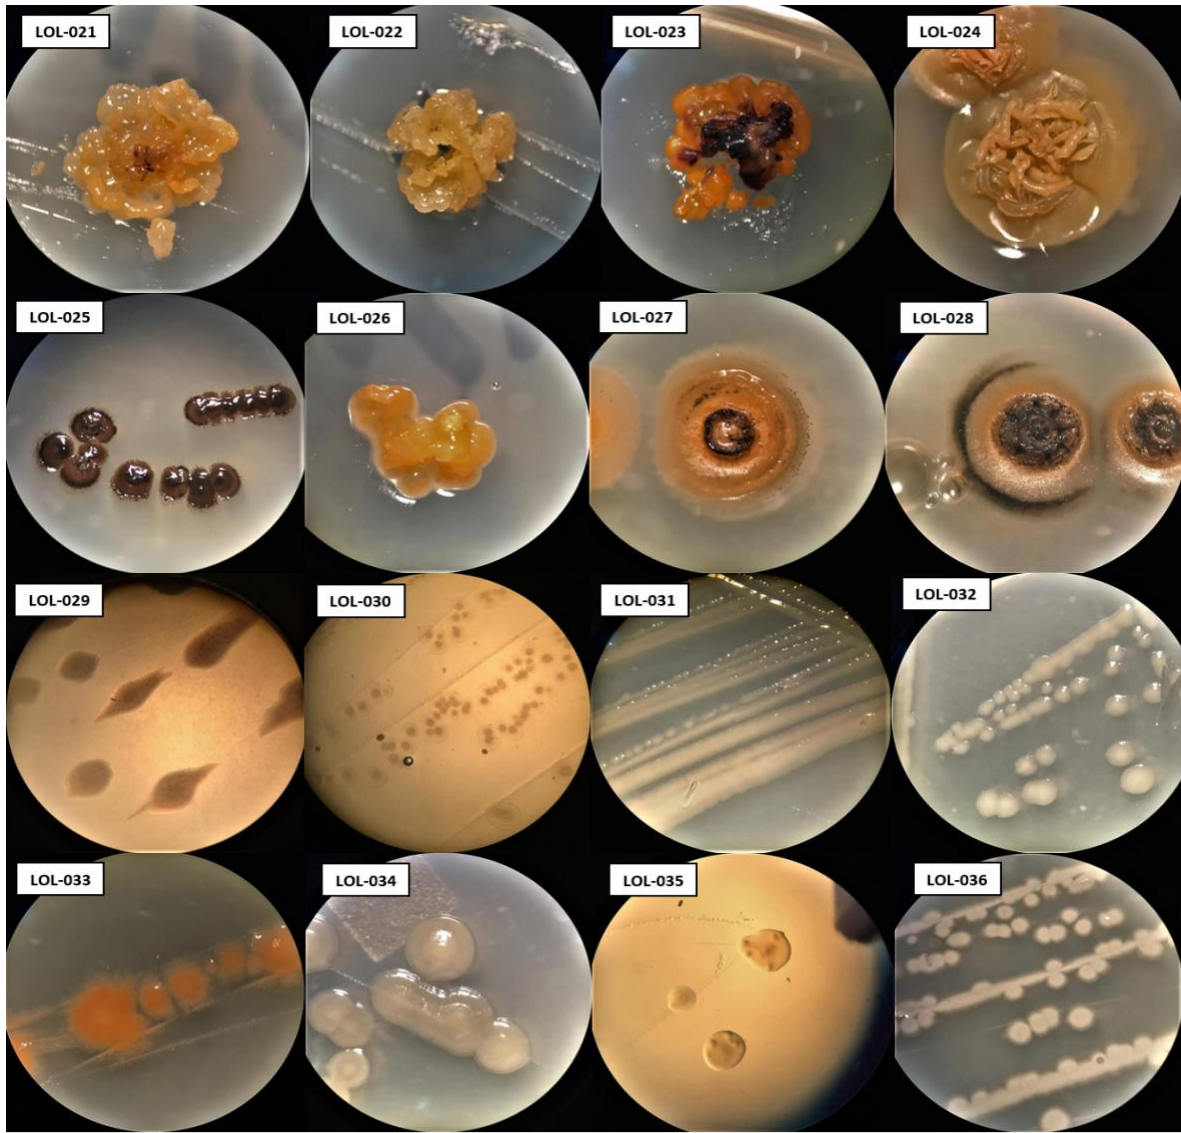

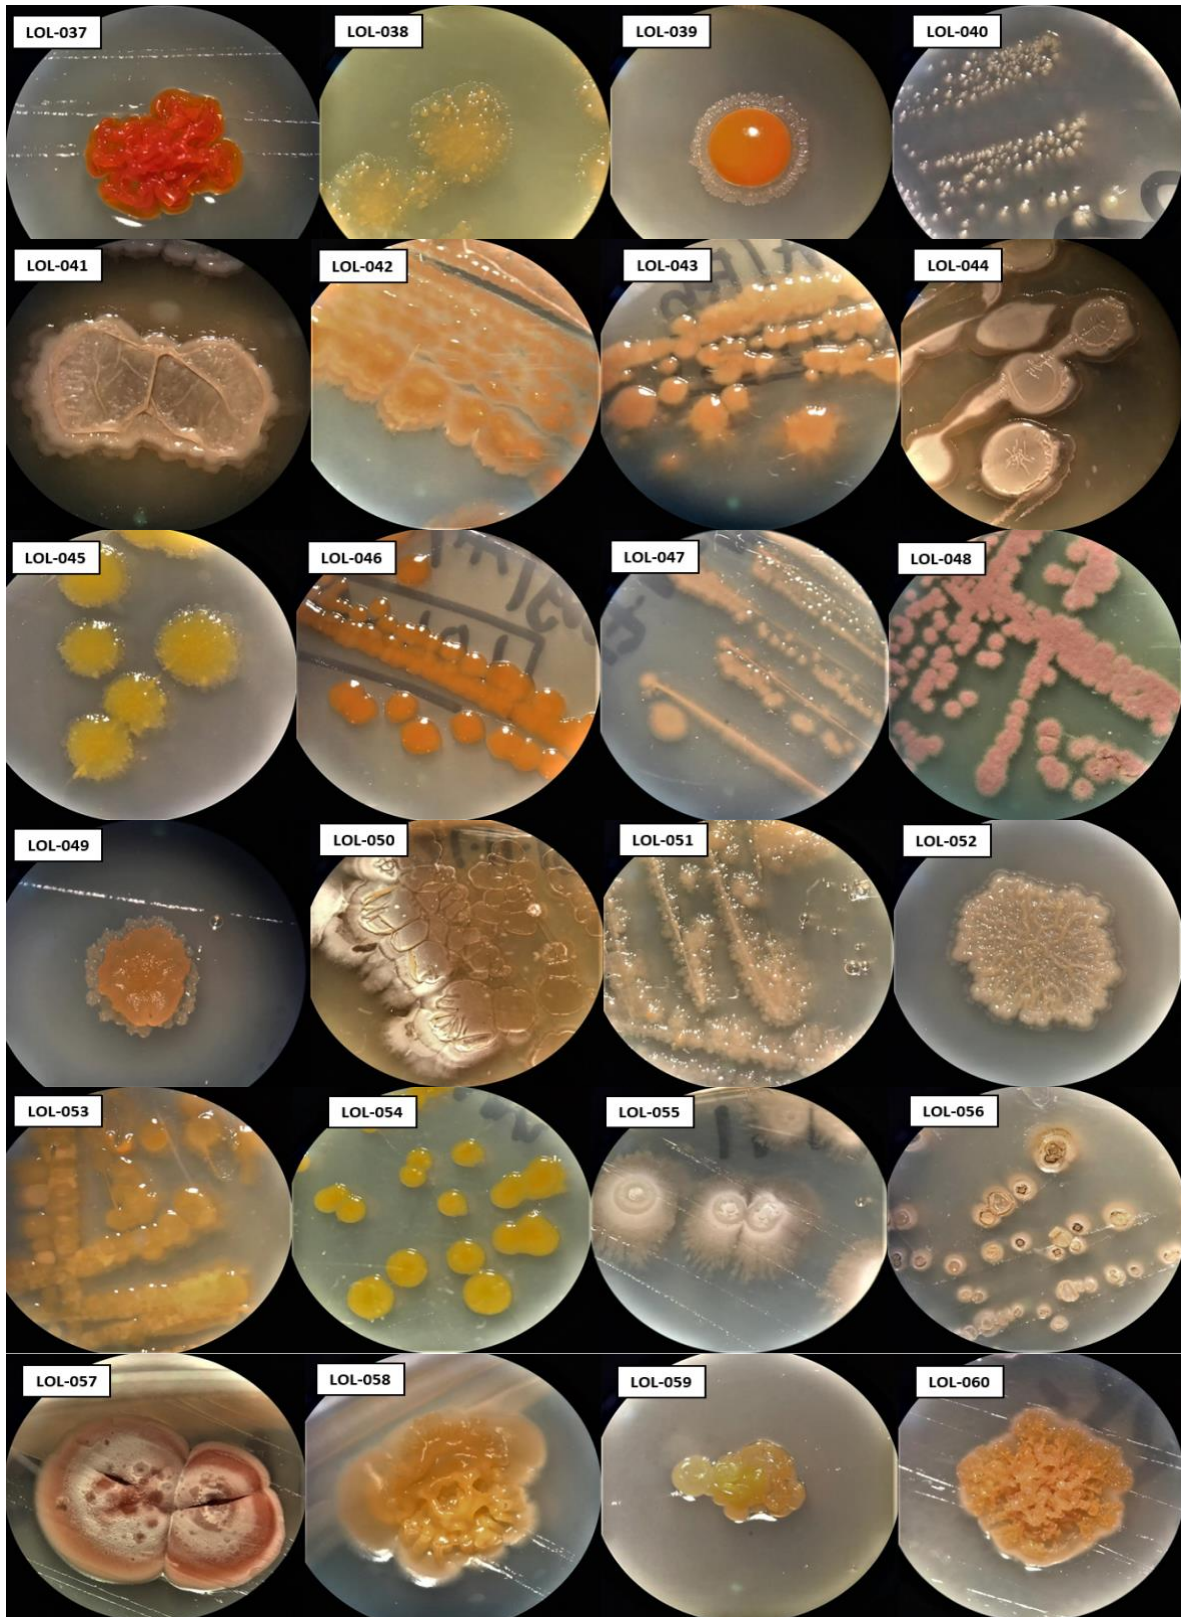

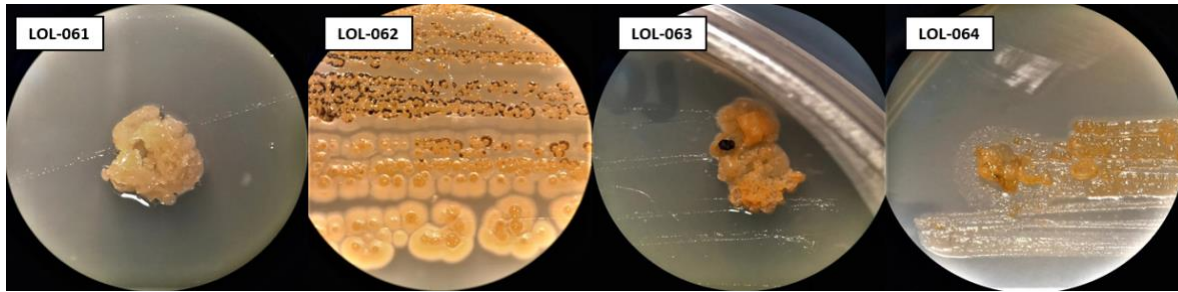

**Supplementary Figure 1.** Morphology of the 64 isolated strains taken with a Labomed Microscope stereomicroscope.

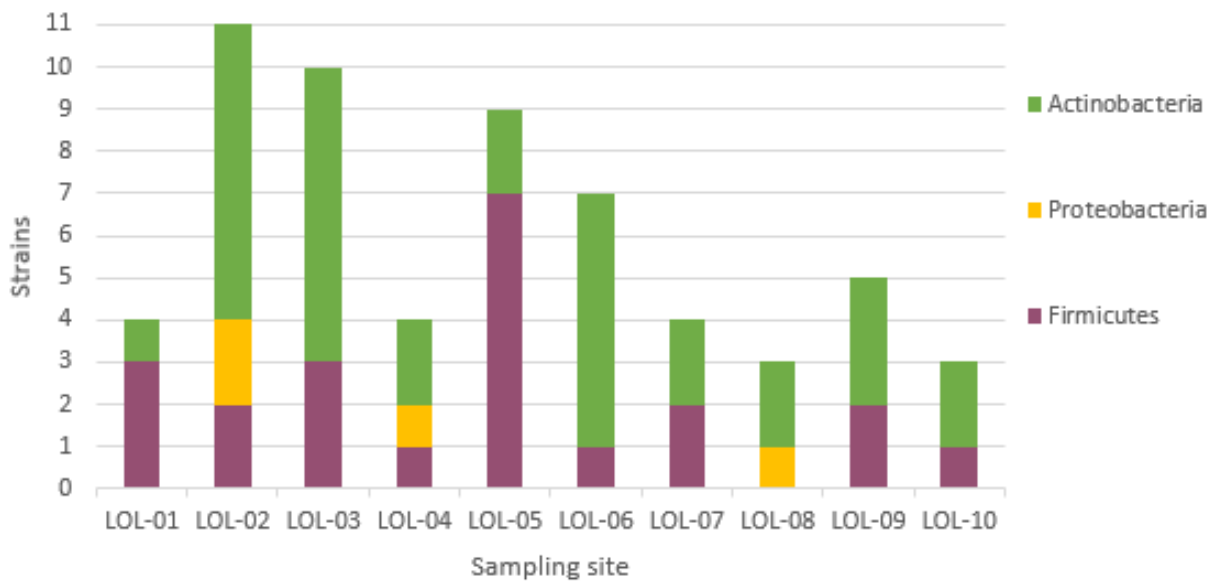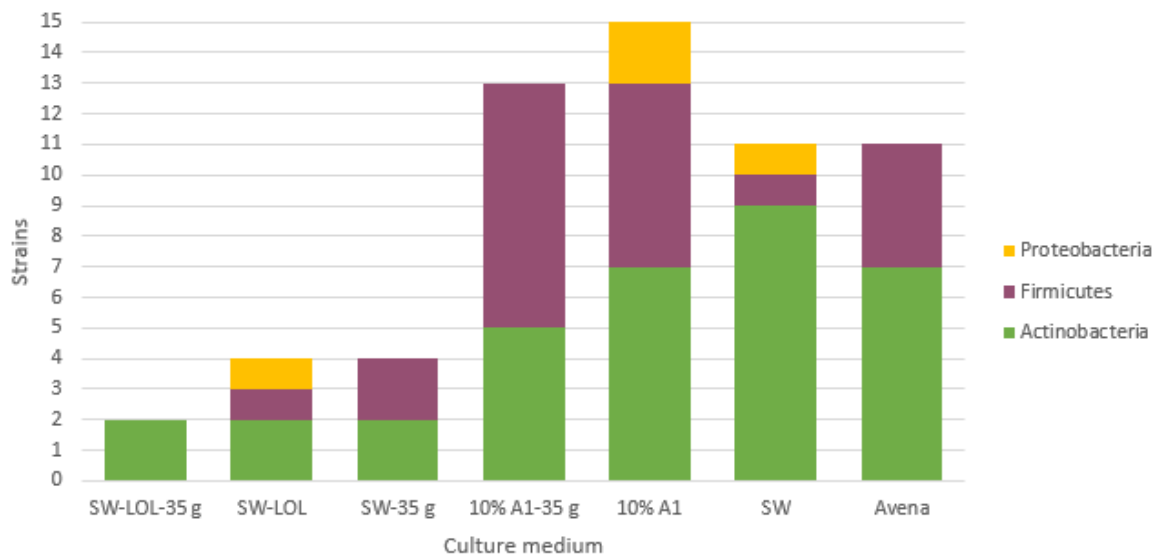

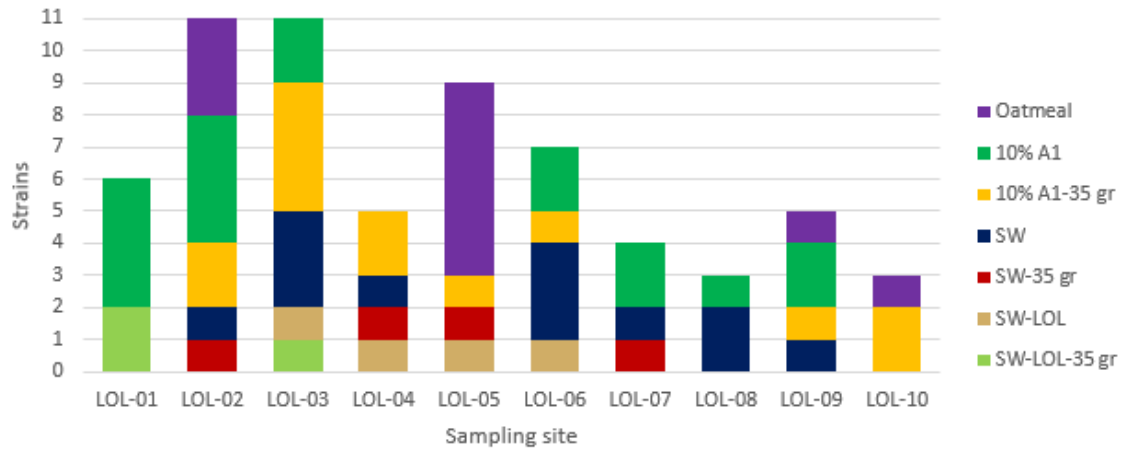

**Supplementary Figure 2. A)** Distribution and abundance of strains identified by sampling station. **B)** Abundance of isolated strains according to the culture medium. **C)** Distribution and abundance of the isolated strains by station based on the culture medium used.

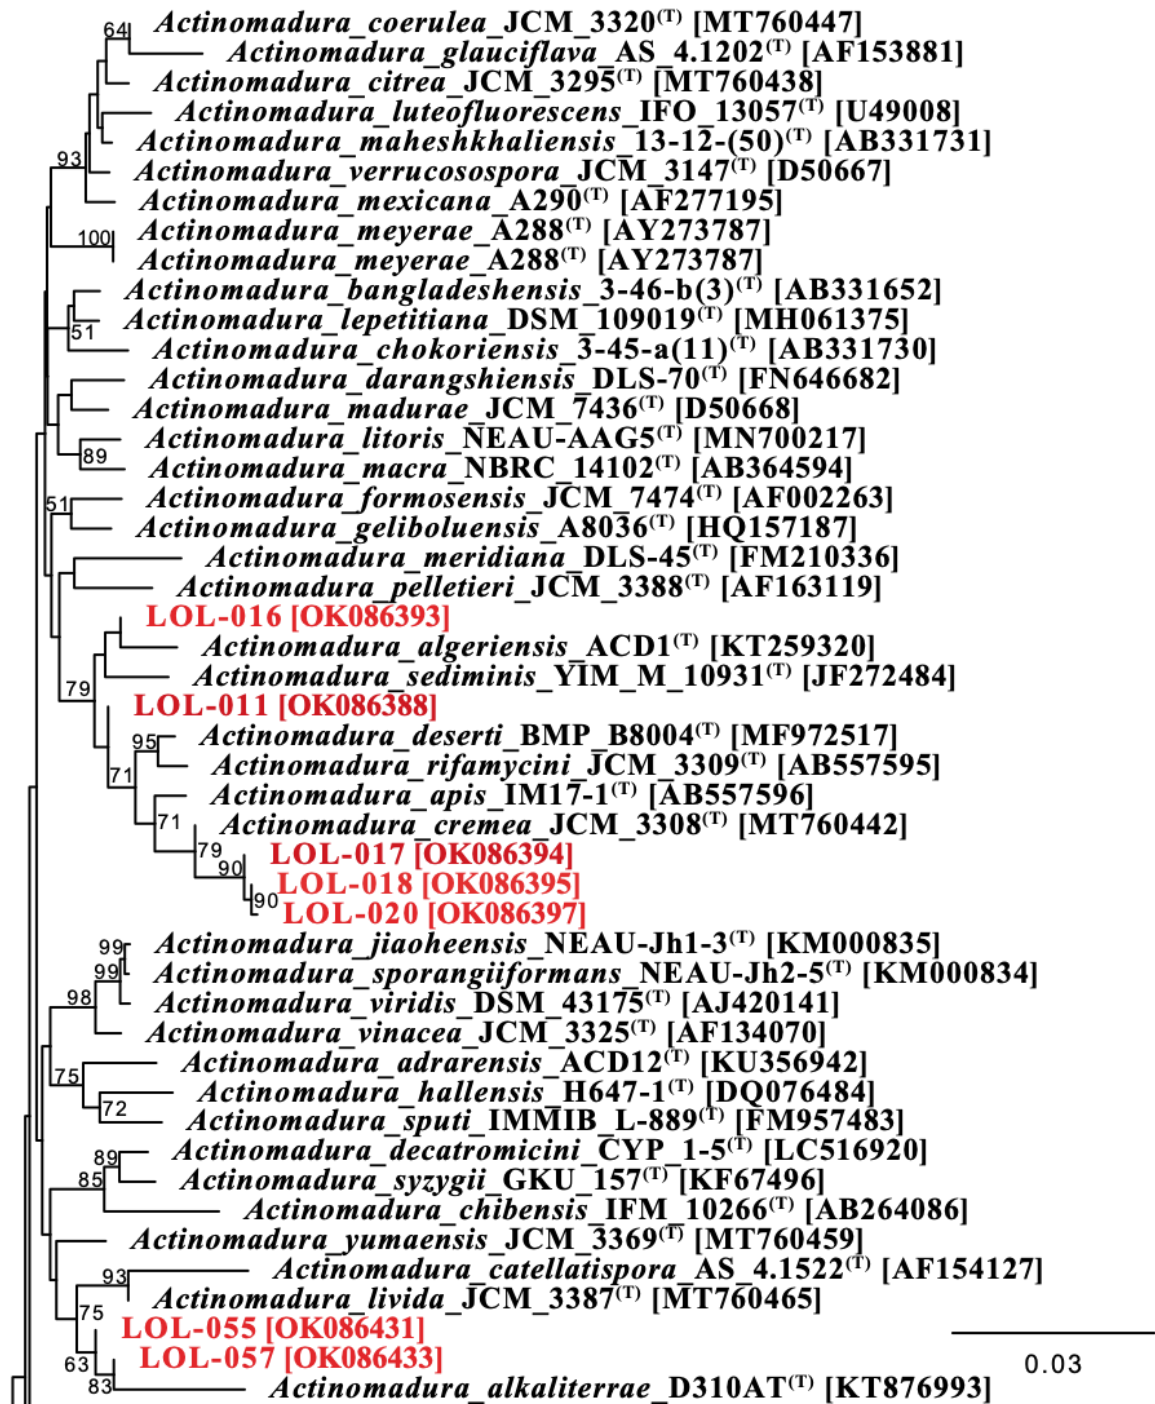

**Supplementary Figure 3.** Neighbor-joining tree based on 16S rRNA gene sequences of LOL-strains (red-colored) and 40 type strains (T) of described species of the genus *Actinomadura* spp. The tree includes [Accession numbers] and bootstrap values higher than 50%. Tamura-Nei model was used.

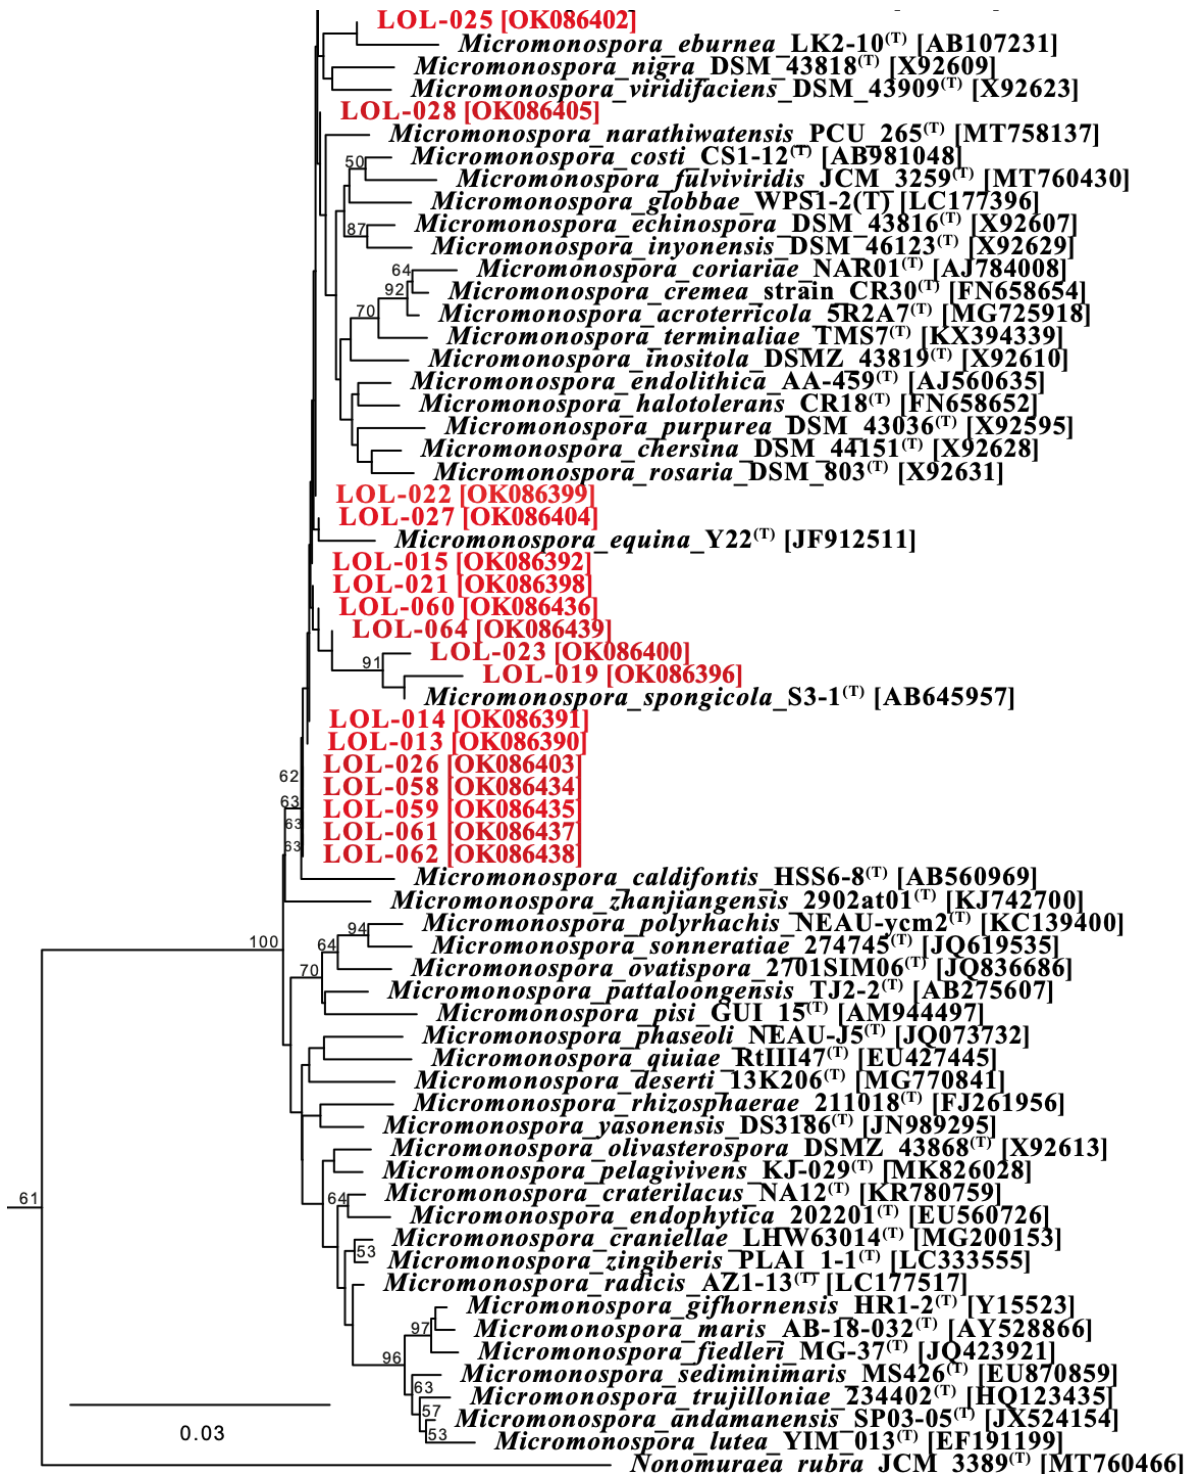

**Supplementary Figure 4.** Neighbor-joining tree based on 16S rRNA gene sequences of LOL-strains (red-colored) and 51 type strains (T) of the genus *Micromonospora* spp. Also includes other genera that had previously described as *Micromonospora*, including: 1T of the genus *Nonomuraea* spp. The tree includes accession numbers and bootstrap values higher than 50%. General Time Reversible model was used.

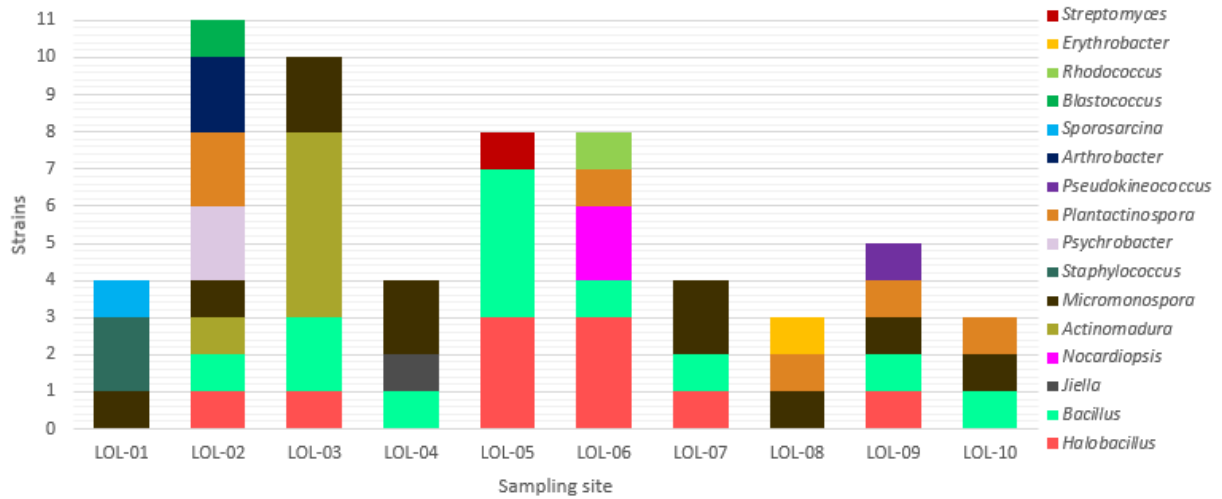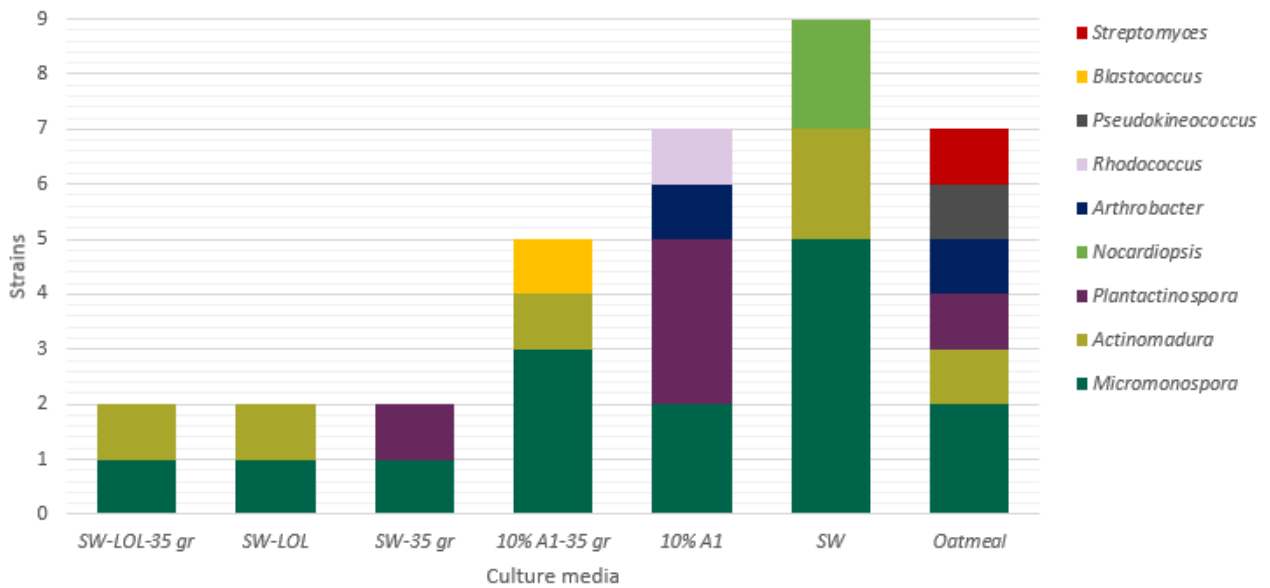

**Supplementary Figure 5. A)** Distribution and abundance of genera of bacterial strains by sampling site. **B)** Distribution of Actinobacteria according to the culture medium.



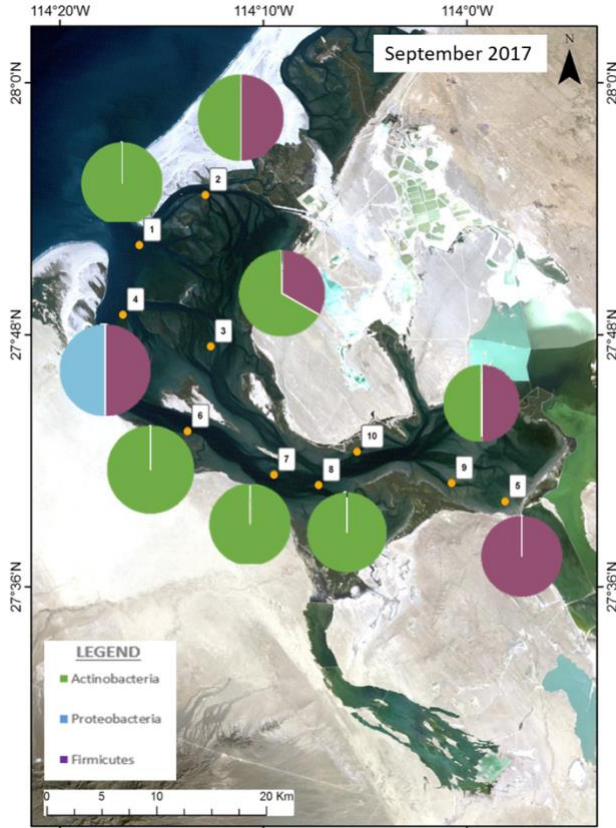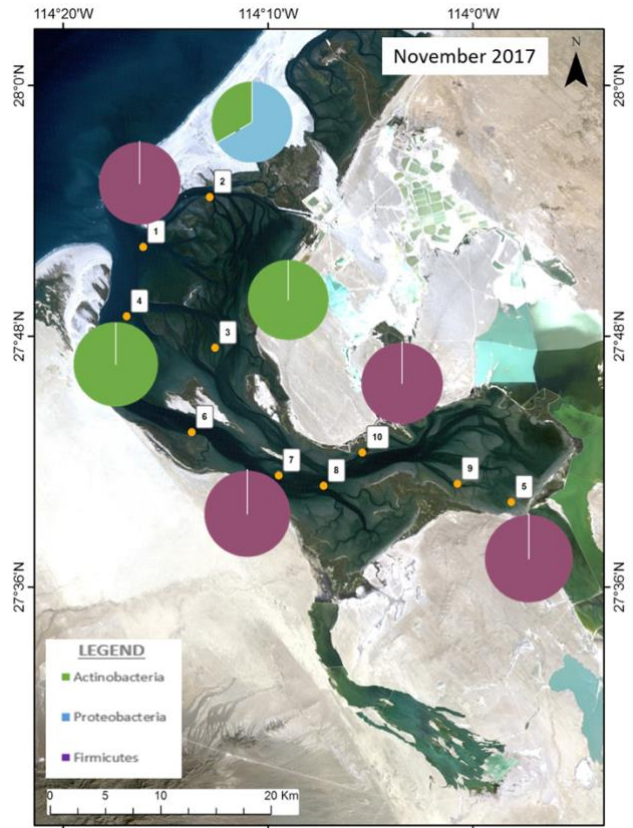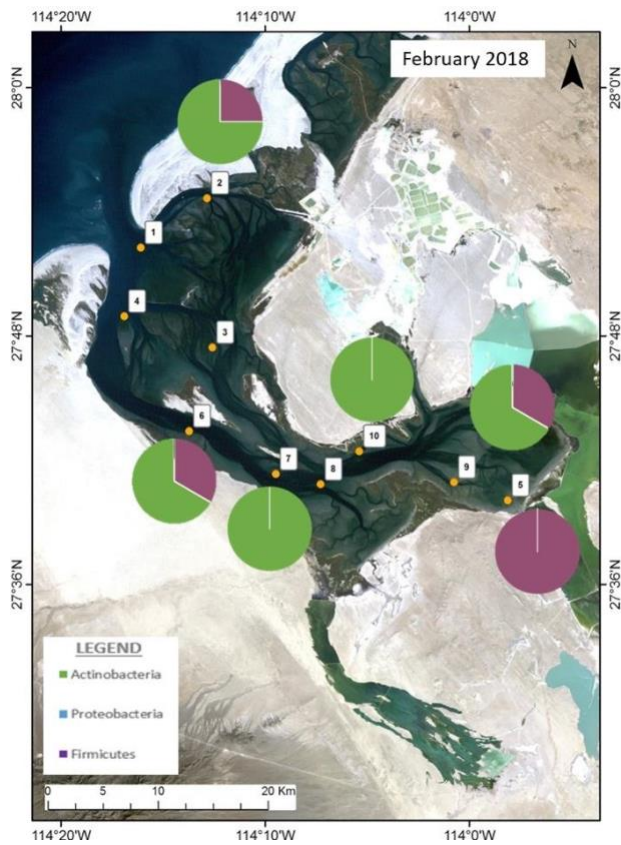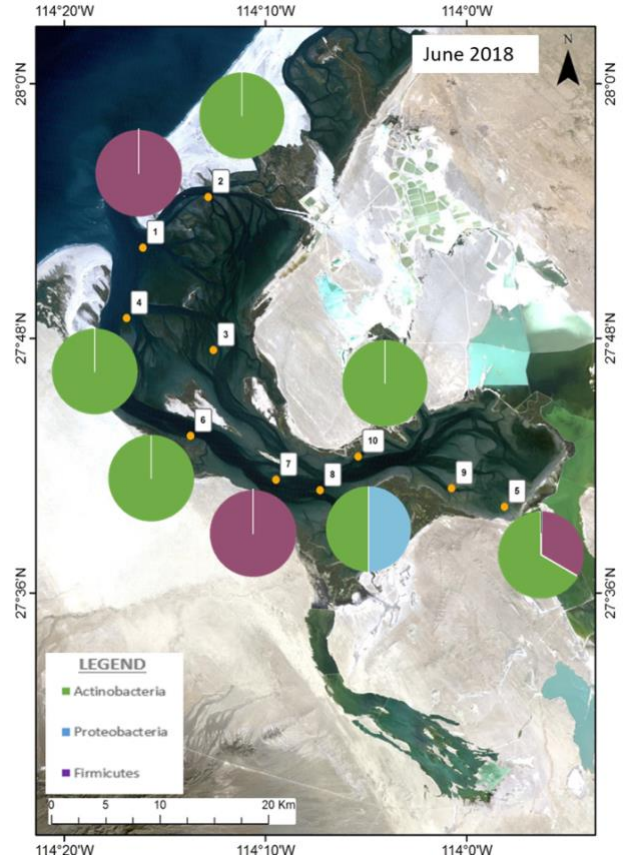

**Supplementary Figure 6. A)** Bacteria distribution map isolated from the sampling season September 2017. **B)** Distribution map of bacteria strains isolated from the sampling season November 2017. **C)** Distribution map of strains of bacteria isolated from the sampling season February 2018. **D)** Distribution map of bacteria strains isolated from the sampling season June 2018.

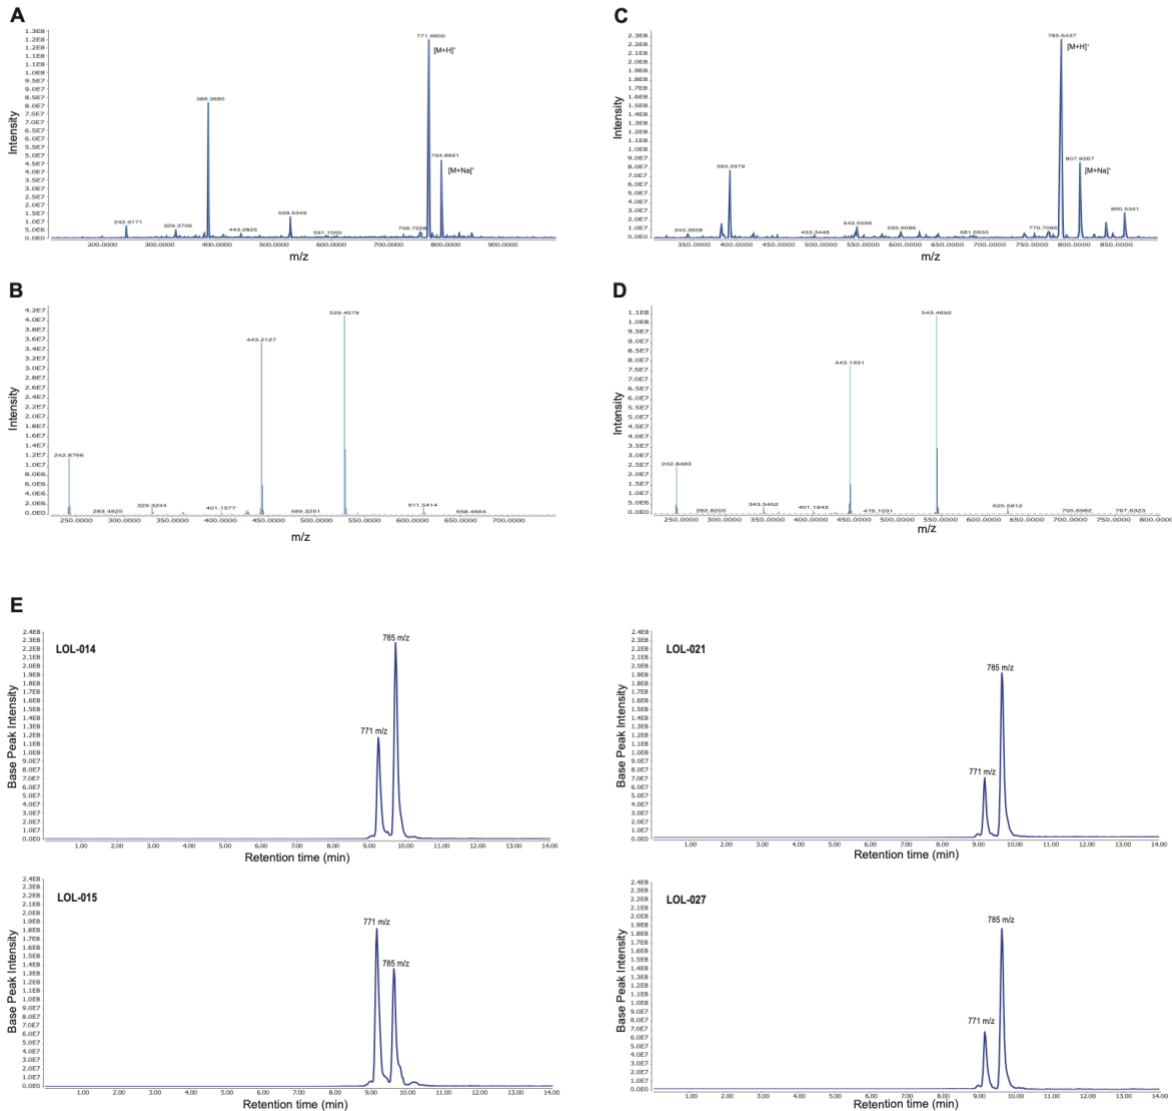

**Supplementary Figure 7.** LCMS data and fragmentation pattern of the 771 m/z and 785 m/z peaks. **A)** Mass spectrometry data of 771 m/z peak, indicating the putative parent ion 771 m/z ( $[M+H]^+$ ) and the sodium adduct 793 m/z ( $[M+Na]^+$ ). **B)** Fragmentation pattern of 771 m/z peak. **C)** Mass spectrometry data of 785 m/z peak, indicating the putative parent ion 785 m/z ( $[M+H]^+$ ) and the sodium adduct 807m/z ( $[M+Na]^+$ ). **D)** Fragmentation pattern of 785 m/z peak **E)** Extracted Ion Chromatogram of the *Micromonospora* sp. strains showing the 771 m/z and 785 m/z peaks; LOL-014 (top left), LOL-015 (bottom left), LOL-021 (top right), and LOL-027 (bottom right).

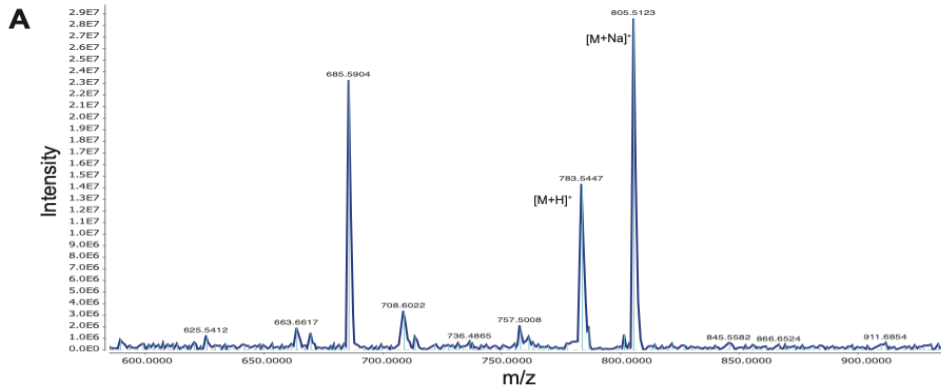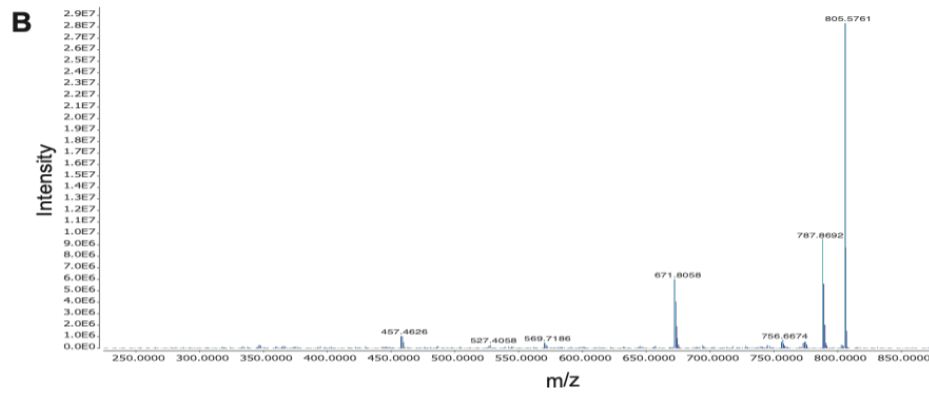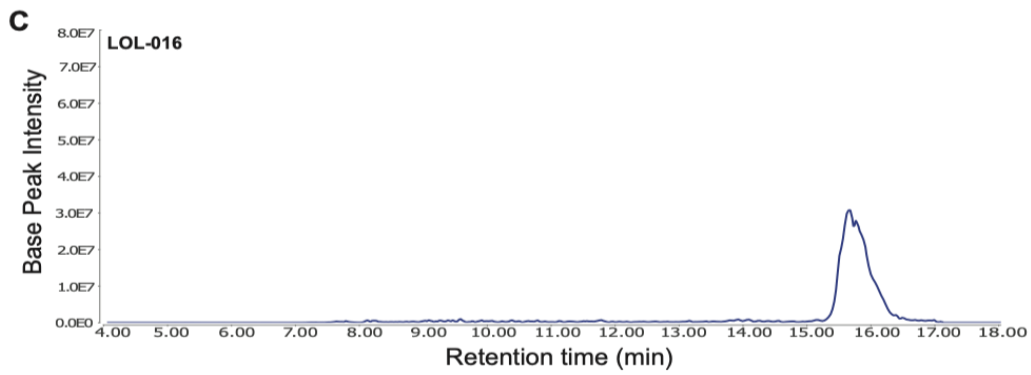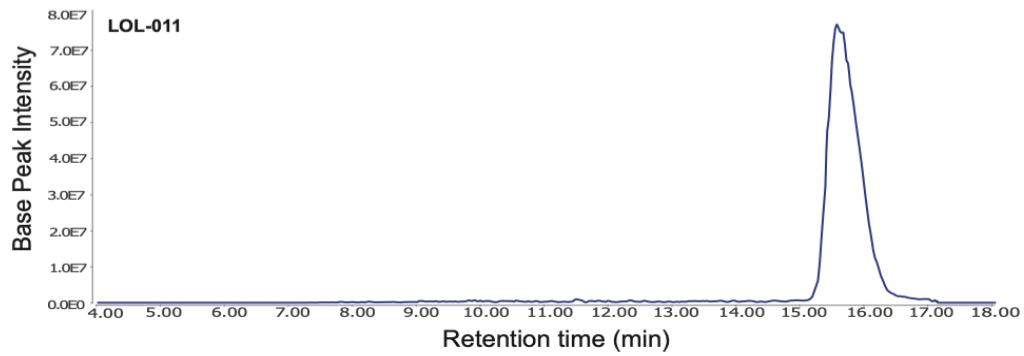

**Supplementary Figure 8.** LCMS data and fragmentation pattern of the 805 m/z peak. **A.** Mass spectrometry data, indicating the putative parent ion 783 m/z ( $[M+H]^+$ ) and the sodium adduct 805 m/z ( $[M+Na]^+$ ) **B.** Fragmentation pattern of 805 m/z peak **C.** Extracted Ion Chromatogram of the *Actinomadura sp.* strains LOL-011 (bottom) and LOL-016 (top), showing the 805 m/z peak.

**Supplementary Table I.** Salinity (PSU) and temperature ( $^{\circ}\text{C}$ ) of each station for each sampling season.

| Sampling site | September   |          | November    |          | February    |          | June        |          |
|---------------|-------------|----------|-------------|----------|-------------|----------|-------------|----------|
|               | Temperature | Salinity | Temperature | Salinity | Temperature | Salinity | Temperature | Salinity |
| S1            | 21.8        | 34.5     | 20.5        | 34.6     | 19.38       | 37.8     | 19.47       | 34.4     |
| S2            | 22.6        | 35.8     | 20.6        | 35.3     | 19.38       | 30.5     | 20.71       | 34.4     |
| S3            | 22.9        | 30.0     | 20.7        | 35.2     | 20.26       | 39.1     | 21.62       | 35.4     |
| S4            | 22.3        | 34.6     | 20.7        | 34.4     | 19.37       | 37.8     | 20.04       | 34.7     |
| S5            | 22.5        | 40.0     | 20.1        | 40.0     | 19.42       | 47.1     | 22.35       | 42.8     |
| S6            | 23.9        | 34.8     | 20.9        | 36.9     | 18.75       | 40.5     | 21.15       | 36.9     |
| S7            | 23.6        | 37.8     | 20.9        | 36.9     | 19.83       | 41.8     | 21.28       | 37.2     |
| S8            | 23.5        | 38.2     | 21.0        | 37.5     | 19.53       | 42.5     | 21.36       | 38.9     |
| S9            | 23.2        | 40.0     | 21.0        | 40.0     | 19.4        | 45.3     | 22.04       | 41.5     |
| S10           | 23.5        | 39.7     | 21.4        | 39.0     | 19.74       | 43.0     | 21.65       | 38.5     |

**Supplementary Table II.** Isolation and taxonomic data of cultured isolates and accession numbers. NI = Not Identified. Sep=September, Nov=November, Feb=February, Jun=June.

| Strain number | Sampling site | Season   | Culture medium | Species name                 | % Similarity of 16S rRNA (sequence length) | Accession number |
|---------------|---------------|----------|----------------|------------------------------|--------------------------------------------|------------------|
| LOL-001       | S2            | Sep 2017 | 10% A1 35 gr   | <i>Halobacillus trueperi</i> | 99.75 (1180 bp)                            | OK086378         |
| LOL-002       | S3            | Sep 2017 | 10% A1 35 gr   | <i>Halobacillus trueperi</i> | 99.75 (1180 bp)                            | OK086379         |
| LOL-003       | S3            | Sep 2017 | 10% A1 35 gr   | <i>Bacillus infantis</i>     | 99.66 (1180 bp)                            | OK086380         |
| LOL-004       | S4            | Sep 2017 | 10% A1 35 gr   | <i>Bacillus rugosus</i>      | 99.82 (566 bp)                             | OK086381         |
| LOL-005       | S5            | Sep 2017 | 10% A1 35 gr   | <i>Halobacillus marinus</i>  | 99.6 (1180 bp)                             | OK086382         |
| LOL-006       | S9            | Sep 2017 | 10% A1 35 gr   | <i>Bacillus pumilus</i>      | 99.58 (1179 bp)                            | OK086383         |
| LOL-007       | S4            | Sep 2017 | SW-LOL         | <i>Jiella aquimaris</i>      | 99.13 (1151 bp)                            | OK086384         |

|         |    |          |              |                                         |                 |          |
|---------|----|----------|--------------|-----------------------------------------|-----------------|----------|
| LOL-008 | S5 | Sep 2017 | SW-LOL       | <i>Metabacillus endolithicus</i>        | 100 (677 bp)    | OK086385 |
| LOL-009 | S3 | Sep 2017 | SW           | <i>Alkalihalobacillus hwajinpoensis</i> | 99.83 (1180 bp) | OK086386 |
| LOL-010 | S6 | Sep 2017 | SW           | <i>Nocardiopsis fildesensis</i>         | 99.71 (684 bp)  | OK086387 |
| LOL-011 | S3 | Sep 2017 | SW           | <i>Actinomadura cremea</i>              | 100 (1160 bp)   | OK086388 |
| LOL-012 | S6 | Sep 2017 | SW           | <i>Nocardiopsis fildesensis</i>         | 99.83 (1176 bp) | OK086389 |
| LOL-013 | S8 | Sep 2017 | SW           | <i>Micromonospora spongicola</i>        | 99.91 (1160 bp) | OK086390 |
| LOL-014 | S9 | Sep 2017 | SW           | <i>Micromonospora spongicola</i>        | 99.91 (1160 bp) | OK086391 |
| LOL-015 | S2 | Sep 2017 | SW           | <i>Micromonospora spongicola</i>        | 99.91 (1160 bp) | OK086392 |
| LOL-016 | S3 | Sep 2017 | SW           | <i>Actinomadura cremea</i>              | 100 (1160 bp)   | OK086393 |
| LOL-017 | S3 | Sep 2017 | SW-LOL 35 gr | <i>Actinomadura cremea</i>              | 99.85 (677 bp)  | OK086394 |
| LOL-018 | S3 | Sep 2017 | SW-LOL       | <i>Actinomadura cremea</i>              | 99.85 (656 bp)  | OK086395 |
| LOL-019 | S3 | Sep 2017 | 10% A1 35 gr | <i>Micromonospora spongicola</i>        | 100 (668 bp)    | OK086396 |
| LOL-020 | S3 | Sep 2017 | 10% A1 35 gr | <i>Actinomadura cremea</i>              | 99.84 (614 bp)  | OK086397 |
| LOL-021 | S1 | Sep 2017 | SW-LOL 35 gr | <i>Micromonospora spongicola</i>        | 99.91 (1161 bp) | OK086398 |
| LOL-022 | S7 | Sep 2017 | SW           | <i>Micromonospora spongicola</i>        | 99.91 (1160 bp) | OK086399 |
| LOL-023 | S6 | Sep 2017 | SW-LOL       | <i>Micromonospora spongicola</i>        | 99.48 (1186 bp) | OK086400 |
| LOL-024 | S4 | Nov 2017 | SW 35 gr     | <i>Micromonospora phaseoli</i>          | 99.91 (1160 bp) | OK086401 |
| LOL-025 | S3 | Nov 2017 | 10% A1       | <i>Micromonospora endolithica</i>       | 100 (1160 bp)   | OK086402 |
| LOL-026 | S2 | Nov 2017 | Oats         | <i>Plantactinospora endophytica</i>     | 99.86 (695 bp)  | OK086403 |

|         |     |          |              |                                     |                 |          |
|---------|-----|----------|--------------|-------------------------------------|-----------------|----------|
| LOL-027 | S6  | Feb 2018 | SW           | <i>Micromonospora spongicola</i>    | 99.91 (1160 bp) | OK086404 |
| LOL-028 | S7  | Feb 2018 | 10% A1       | <i>Micromonospora spongicola</i>    | 99.91 (1160 bp) | OK086405 |
| LOL-029 | S1  | Nov 2017 | 10% A1       | <i>Staphylococcus pasteurii</i>     | 100 (1181 bp)   | OK086406 |
| LOL-030 | S1  | Nov 2017 | 10% A1       | <i>Staphylococcus epidermidis</i>   | 99.92 (1181 bp) | OK086407 |
| LOL-031 | S2  | Nov 2017 | 10% A1       | <i>Psychrobacter celer</i>          | 99.86 (720 bp)  | OK086408 |
| LOL-032 | S2  | Nov 2017 | 10% A1       | <i>Psychrobacter nivimaris</i>      | 100 (1180 bp)   | OK086409 |
| LOL-033 | S5  | Nov 2017 | Oats         | <i>Cytobacillus luteolus</i>        | 99.86 (717 bp)  | OK086410 |
| LOL-034 | S5  | Nov 2017 | Oats         | <i>Halobacillus marinus</i>         | 99.66 (1180 bp) | OK086411 |
| LOL-035 | S7  | Nov 2017 | 10% A1       | <i>Halobacillus mangrovi</i>        | 99.86 (698 bp)  | OK086412 |
| LOL-036 | S10 | Nov 2017 | 10% A1 35 gr | <i>Bacillus zhangzhouensis</i>      | 100 (1159 bp)   | OK086413 |
| LOL-037 | S9  | Feb 2018 | 10% A1       | <i>Micromonospora fluostatini</i>   | 99.14 (1160 bp) | OK086414 |
| LOL-038 | S9  | Feb 2018 | 10% A1       | <i>Halobacillus trueperi</i>        | 100 (1180 bp)   | OK086415 |
| LOL-039 | S9  | Feb 2018 | Oats         | <i>Pseudokineococcus marinus</i>    | 99.86 (700 bp)  | OK086416 |
| LOL-040 | S6  | Feb 2018 | 10% A1       | <i>Plantactinospora endophytica</i> | 99.86 (690 bp)  | OK086417 |
| LOL-041 | S6  | Feb 2018 | 10% A1 35 gr | <i>Bacillus nakamurai</i>           | 99.92 (1180 bp) | OK086418 |
| LOL-042 | S5  | Feb 2018 | Oats         | <i>ABCF_s (Bacillus)</i>            | 99.72 (703 bp)  | OK086419 |
| LOL-043 | S5  | Feb 2018 | Oats         | <i>Cytobacillus luteolus</i>        | 98.51 (739 bp)  | OK086420 |
| LOL-044 | S2  | Feb 2018 | 10% A1       | <i>Bacillus cabrialesii</i>         | 100 (1180 bp)   | OK086421 |
| LOL-045 | S2  | Feb 2018 | Oats         | <i>Arthrobacter subterraneus</i>    | 100 (1162 bp)   | OK086422 |

|         |     |          |              |                                         |                 |          |
|---------|-----|----------|--------------|-----------------------------------------|-----------------|----------|
| LOL-046 | S2  | Feb 2018 | 10% A1       | <i>Arthrobacter subterraneus</i>        | 100 (1162 bp)   | OK086423 |
| LOL-047 | S1  | Jun 2018 | 10% A1       | <i>Sporosarcina aquimarina</i>          | 98.81 (1181 bp) | OK086424 |
| LOL-048 | S1  | Jun 2018 | SW           | NI                                      | NI              |          |
| LOL-049 | S2  | Jun 2018 | 10% A1 35 gr | <i>Blastococcus massiliensis</i>        | 99.27 (546 bp)  | OK086425 |
| LOL-050 | S5  | Jun 2018 | Oats         | <i>Streptomyces chumphonensis</i>       | 100 (1168 bp)   | OK086426 |
| LOL-051 | S5  | Jun 2018 | SW 35 gr     | <i>Halobacillus marinus</i>             | 99.66 (1180 bp) | OK086427 |
| LOL-052 | S6  | Jun 2018 | 10% A1       | <i>Rhodococcus nanhaiensis</i>          | 99.22 (1161 bp) | OK086428 |
| LOL-053 | S7  | Jun 2018 | SW 35 gr     | <i>Alkalihalobacillus hwajinpoensis</i> | 99.83 (1180 bp) | OK086429 |
| LOL-054 | S8  | Jun 2018 | SW           | <i>Qipengyuania citrea</i>              | 100 (1154 bp)   | OK086430 |
| LOL-055 | S2  | Feb 2018 | Oats         | <i>Actinomadura livida</i>              | 99.40 (1169 bp) | OK086431 |
| LOL-056 | S2  | Jun 2018 | SW 35 gr     | <i>Plantactinospora endophytica</i>     | 99.82 (555 bp)  | OK086432 |
| LOL-057 | S3  | Jun 2018 | 10% A1       | <i>Actinomadura livida</i>              | 99.40 (1169 bp) | OK086433 |
| LOL-058 | S4  | Jun 2018 | 10% A1 35 gr | <i>Micromonospora spongicola</i>        | 100 (505 bp)    | OK086434 |
| LOL-059 | S4  | Jun 2018 | SW           | <i>Micromonospora spongicola</i>        | 99.86 (732 bp)  | OK086435 |
| LOL-060 | S5  | Jun 2018 | Oats         | <i>Micromonospora spongicola</i>        | 99.91 (1160 bp) | OK086436 |
| LOL-061 | S8  | Jun 2018 | 10% A1       | <i>Plantactinospora endophytica</i>     | 99.86 (716 bp)  | OK086437 |
| LOL-062 | S10 | Jun 2018 | Oats         | <i>Plantactinospora endophytica</i>     | 99.86 (705 bp)  | OK086438 |
| LOL-063 | S1  | Jun 2018 | 10% A1       | NI                                      | NI              |          |

|         |     |          |              |                                  |                 |          |
|---------|-----|----------|--------------|----------------------------------|-----------------|----------|
| LOL-064 | S10 | Feb 2018 | 10% A1 35 gr | <i>Micromonospora spongicola</i> | 99.91 (1160 bp) | OK086439 |
|---------|-----|----------|--------------|----------------------------------|-----------------|----------|

**Supplementary Table III.** Cell viability (%) results for the lung (H1299), cervical (HeLa, SiHa and CaSki), colon (Caco-2), and liver (Hep G2) cancer cell lines derived from *Micromonospora* (LOL-013,14,15, 21, 23, 24, 24, 27 and 28) and *Actinomadura* (LOL-011 and LOL-016) crude extracts. Significance values are shown for each cell line ( $p^* < 0.05$ ,  $p^{**} < 0.01$ ,  $p^{***} < 0.001$ ).

| Strain         | Cancer cell line | Cell viability (%) | Significance |
|----------------|------------------|--------------------|--------------|
| <b>LOL-011</b> | CasKi            | 10                 | **           |
|                | HeLa             | 11                 | *            |
|                | SiHa             | 2                  | *            |
|                | Caco-2           | 18                 | **           |
|                | Hep G2           | 14                 | *            |
|                | H1299            | 8                  | **           |
| <b>LOL-013</b> | CasKi            | 90                 |              |
|                | HeLa             | 111                | *            |
|                | SiHa             | 70                 | *            |
|                | Caco-2           | 97                 |              |
|                | Hep G2           | 135                |              |
|                | H1299            | 95                 |              |
| <b>LOL-014</b> | CasKi            | 61                 | **           |
|                | HeLa             | 101                |              |
|                | SiHa             | 75                 | *            |
|                | Caco-2           | 53                 | ***          |
|                | Hep G2           | 99                 |              |
|                | H1299            | 62                 |              |
| <b>LOL-015</b> | CasKi            | 71                 | *            |
|                | HeLa             | 92                 |              |
|                | SiHa             | 77                 | **           |



|                |        |     |     |
|----------------|--------|-----|-----|
|                | Caco-2 | 85  |     |
|                | Hep G2 | 105 |     |
|                | H1299  | 68  |     |
| <b>LOL-016</b> | CasKi  | 7   | **  |
|                | HeLa   | 8   | *   |
|                | SiHa   | 3   | *** |
|                | Caco-2 | 16  | *** |
|                | Hep G2 | 18  | *   |
|                | H1299  | 4   | *   |
| <b>LOL-021</b> | CasKi  | 52  | **  |
|                | HeLa   | 82  | *   |
|                | SiHa   | 63  | *   |
|                | Caco-2 | 69  |     |
|                | Hep G2 | 97  |     |
|                | H1299  | 67  | *   |
| <b>LOL-023</b> | CasKi  | 62  | **  |
|                | HeLa   | 82  | *   |
|                | SiHa   | 89  | *   |
|                | Caco-2 | 90  |     |
|                | Hep G2 | 124 |     |
|                | H1299  | 107 |     |
| <b>LOL-024</b> | CasKi  | 81  |     |
|                | HeLa   | 86  | *   |
|                | SiHa   | 84  |     |
|                | Caco-2 | 91  |     |
|                | Hep G2 | 105 |     |
|                | H1299  | 72  |     |
| <b>LOL-025</b> | CasKi  | 63  | *   |
|                | HeLa   | 80  | *   |

|                |        |     |    |
|----------------|--------|-----|----|
|                | SiHa   | 43  | *  |
|                | Caco-2 | 41  | ** |
|                | Hep G2 | 56  | *  |
|                | H1299  | 53  | *  |
| <b>LOL-027</b> | Caski  | 48  | ** |
|                | HeLa   | 54  | *  |
|                | SiHa   | 34  | ** |
|                | Caco-2 | 102 |    |
|                | Hep G2 | 71  |    |
|                | H1299  | 66  | ** |
| <b>LOL-028</b> | Caski  | 85  |    |
|                | HeLa   | 86  | *  |
|                | SiHa   | 89  |    |
|                | Caco-2 | 92  |    |
|                | Hep G2 | 143 | *  |
|                | H1299  | 112 |    |
